# Supplementary material for: An orange peel-derived zirconium-coordination polymer for highly efficient reductive upgradation of 5-hydroxymethylfurfural
Source: Royal Society of Chemistry journal article supplement (doi:10.1039/d4nj03426k), 2024-01-01
Supplement: d4nj03426k1.pdf [file d4nj03426k1.pdf]

## Supporting Information

Siyu Sun <sup>1,2</sup>, Ying Wan <sup>1</sup>, Zheng Li <sup>1</sup>, Lumen Chao <sup>1</sup>, Yuanyuan Bai <sup>1</sup>, Qunhua Liu <sup>1</sup>, Can Wang <sup>1</sup>, Wen Liu <sup>1\*</sup> and Peijun Ji<sup>2\*</sup>

<sup>1</sup> China National Pulp and Paper Research Institute

<sup>2</sup> College of Chemical Engineering, Beijing University of Chemical Technology

**Table S1** FTIR spectra data of NES.

|                                 | NES (cm <sup>-1</sup> ) |
|---------------------------------|-------------------------|
| -OH stretching vibration        | 3500                    |
| C-H stretching vibration        | 2922                    |
| -C=O                            | 1636                    |
| Benzene ring skeleton vibration | 1600-1300               |
| C-O                             | 1200-1000               |
| C-H                             | 900-600                 |

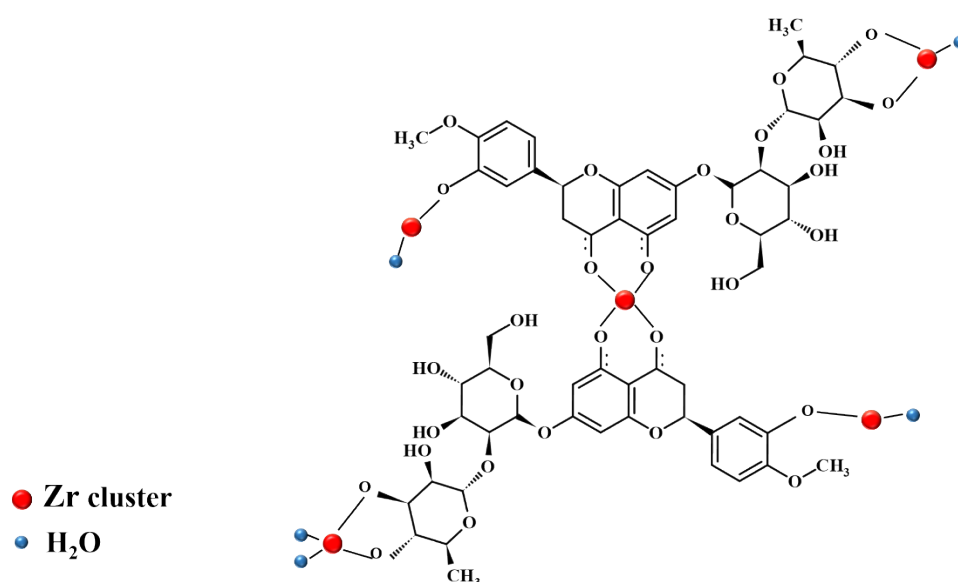

**Scheme S1** Possible structure for Zr-NES<sub>0.1</sub>.

**Table S2** Textural properties of characterization of Zr-NES.

| Sample                 | Surface area (m <sup>2</sup> /g) <sup>a</sup> | Pore volume (cm <sup>3</sup> /g) <sup>b</sup> | Average pore size (nm) <sup>b</sup> |
|------------------------|-----------------------------------------------|-----------------------------------------------|-------------------------------------|
| NES                    | 25.7                                          | 0.013                                         | 4.2                                 |
| Zr-NES <sub>0.2</sub>  | 82.7                                          | 0.339                                         | 17.2                                |
| Zr-NES <sub>0.1</sub>  | 162.1                                         | 0.442                                         | 3.3                                 |
| Zr-NES <sub>0.05</sub> | 22.1                                          | 0.057                                         | 10.3                                |
| ZrO <sub>2</sub>       | 3.5                                           | 0.019                                         | 21.7                                |

<sup>a</sup> Surface areas were obtained by the method of BET. <sup>b</sup> Pore sizes and pore volumes were estimated by the method of BJH.

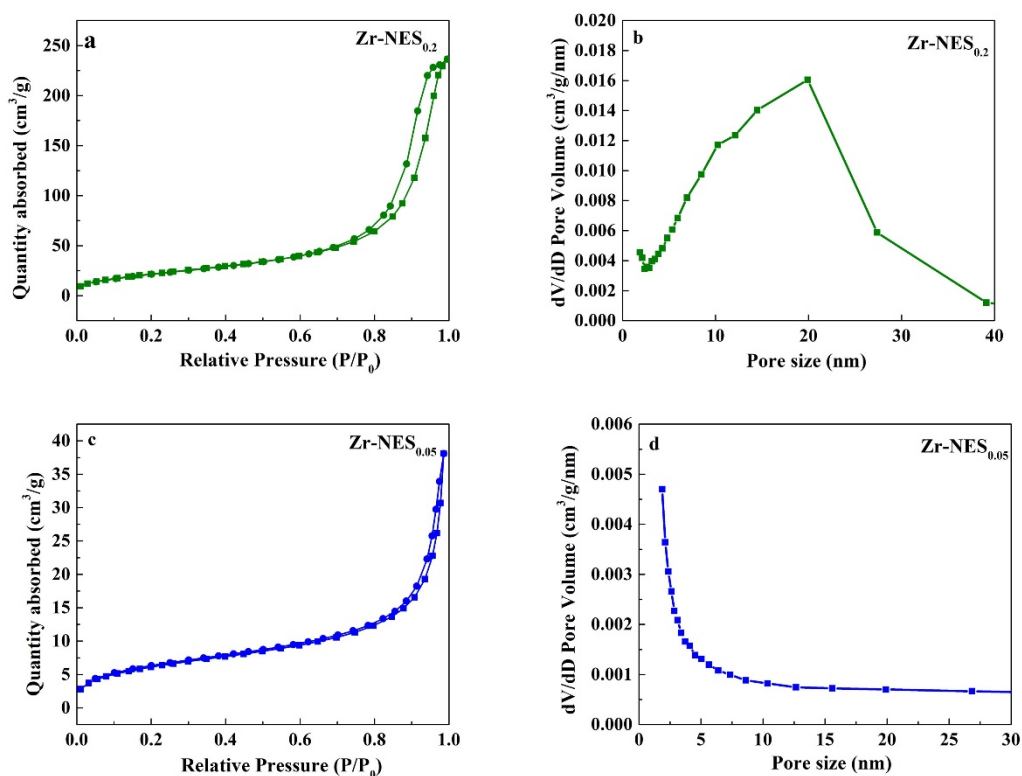

**Figure S1.** N<sub>2</sub> adsorption-desorption curves and pore diameter distribution of (a, b) Zr-NES<sub>0.2</sub> and (c, d) Zr-NES<sub>0.05</sub>.

**Table S3** CTH of HMF to BHMF by various Zr-based catalysts.

| Catalyst              | T(°C) | Time(h) | Reaction conditions <sup>a</sup> | HMF<br>conv.<br>(%) | BHMF<br>yield (%) | TOF <sup>b</sup><br>(h <sup>-1</sup> ) | Ref       |
|-----------------------|-------|---------|----------------------------------|---------------------|-------------------|----------------------------------------|-----------|
| Zr-FDCA               | 140   | 8       | 2mmol/10mL/0.1g                  | 97                  | 96                | 1.62                                   | 20        |
| ZrPN                  | 140   | 2       | 2.5mmol/10mL/0.1g                | 98                  | 98                | 3.55                                   | 56        |
| Zr-DTPA               | 140   | 4       | 3.9mmol/31mL/0.3g                | 98                  | 95                | 1.72                                   | 57        |
| Zr-HTC                | 120   | 4       | 3.9mmol/31mL/0.2g                | 99                  | 99                | 5.61                                   | 35        |
| Zr-chitosan           | 120   | 4       | 0.25mmol/1mL/15mol%              | 98                  | 94                | 1.67                                   | 58        |
| Zr-LS                 | 100   | 2       | 1mmol/10mL/0.1g                  | 97                  | 96                | 2.01                                   | 22        |
| Zr-TA                 | 100   | 5       | 1mmol/10mL/0.1g                  | 95                  | 89                | 0.73                                   | 23        |
| Zr-NES <sub>0.1</sub> | 120   | 2       | 3.9mmol/31mL/0.1g                | 99                  | 99                | 8.50                                   | This work |

<sup>a</sup>Reaction conditions: The reaction conditions represent, respectively, the molar amount of the reactant, the volume of the reaction solution and the mass of the catalyst. i.e. 2mmol/10mL/0.1g represent 2 mmol 5-HMF in 10 ml solvent, 0.1g catalyst.

<sup>b</sup>  $TOF = \frac{\text{mole of BHMF produced}}{\text{mole of } Zr^{4+} \text{ presented in the catalyst} \times \text{reaction time}} (h^{-1})$ . The mole of  $Zr^{4+}$  present in the catalyst was determined by ICP-AES.
